# Supplementary material for: Efficient carbon-based CsPbI2Br perovskite solar cells using bifunctional polymer modification
Source: Royal Society of Chemistry journal article supplement (doi:10.1039/d1se00713k), 2021-01-01
Supplement: d1se00713k1.pdf [file d1se00713k1.pdf]

## Supporting Information

### Efficient Carbon-based CsPbI<sub>2</sub>Br Perovskite Solar Cells using Bifunctional Polymer Modification

Lulu Wang,<sup>†,‡</sup> Bingbing Fan,<sup>†</sup> Donghui Wei<sup>‡</sup>, Zhibin Yang,<sup>\*,‡</sup> Bing Zheng,<sup>†</sup> Penggang Yin,<sup>\*,†</sup> Lijun Huo<sup>\*,†</sup>

<sup>†</sup> School of Chemistry, Beihang University, Beijing 100191, PR China

<sup>‡</sup> School of Chemical and Environment engineering, China University of Mining and Technology-Beijing, Beijing 100083, PR China

<sup>‡</sup> College of Chemistry and Molecular Engineering, Zhengzhou University, Zhengzhou 450001, P. R. China

\*Corresponding author: e-mail: [yangzhibin0001@163.com](mailto:yangzhibin0001@163.com), [pgyin@buaa.edu.cn](mailto:pgyin@buaa.edu.cn), [huolijun@buaa.edu.cn](mailto:huolijun@buaa.edu.cn).

#### Table of Content:

|                                                          |     |
|----------------------------------------------------------|-----|
| Density Functional Theory (DFT) calculations.....        | S-2 |
| Fourier transform infrared (FTIR) spectra.....           | S-3 |
| current density-voltage (J-V) characteristic curve.....  | S-3 |
| performance parameters.....                              | S-4 |
| steady-state photoluminescence (PL) measurements.....    | S-4 |
| time-resolved photoluminescence (TRPL) measurements..... | S-4 |

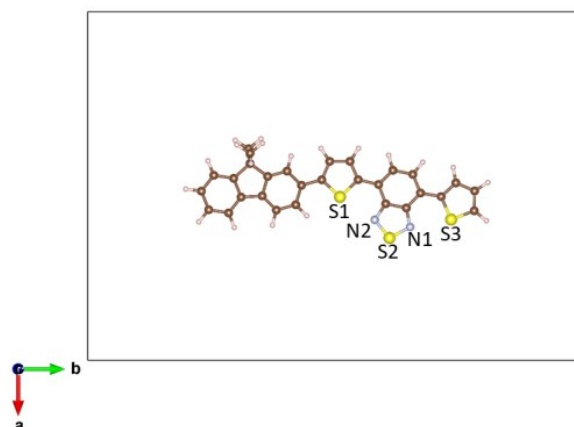

**Figure S1.** The label of atom in the monomers of PTDTBT molecule.

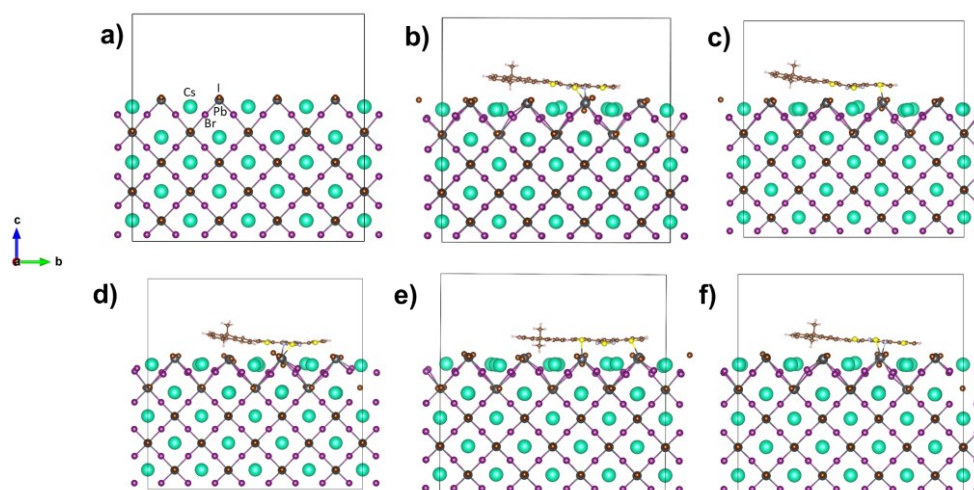

**Figure S2.** Atomic structure of optimized CsPbI<sub>2</sub>Br (001) surface with adsorbed PTDTBT. **a)** CsPbI<sub>2</sub>Br (100), **b)** N<sub>1</sub>-Pb-S<sub>2</sub>, **c)** N<sub>2</sub>-Pb-S<sub>2</sub>, **d)** 2S<sub>1</sub>-Pb, **e)** S<sub>2</sub>-Pb-N<sub>1</sub>, **f)** S<sub>3</sub>-Pb.

**Table S1.** Adsorption energy of different atoms interacting with perovskite.

|                       | <b>E(eV)</b> | <b>ΔE(eV)</b> |
|-----------------------|--------------|---------------|
| PTDTBT                | -365.08014   | -             |
| CsPbI <sub>2</sub> Br | -856.79954   | -             |
| N1-Pb-S2              | -1221.4575   | 0.42218       |
| N2-Pb-S2              | -1221.3694   | 0.51028       |
| 2S1-Pb                | -1221.1487   | 0.73098       |
| S2-Pb-N1              | -1212.9055   | 8.97418       |
| S3-Pb                 | -1212.5540   | 9.32568       |

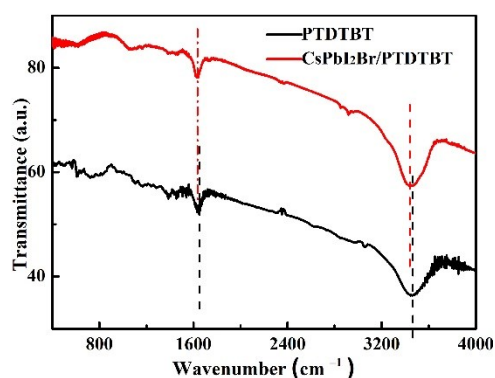

**Figure S3.** Fourier transform infrared (FTIR) spectra of PTDTBT and CsPbI<sub>2</sub>Br/PTDTBT, respectively.

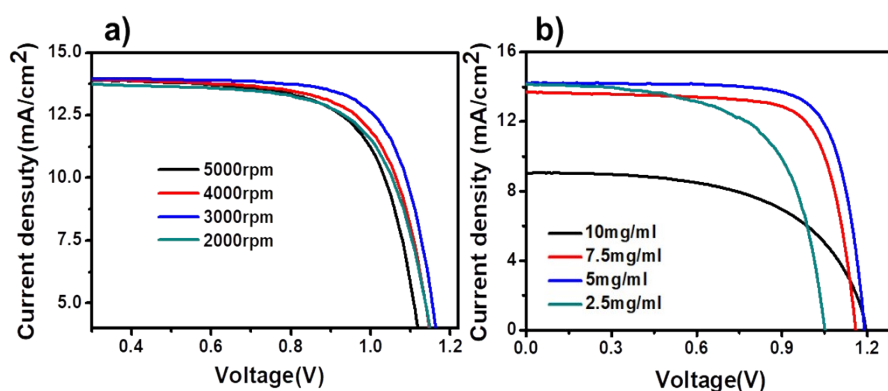

**Figure S4.**  $J$ - $V$  curves of devices with PTDTBT processed by **a)** different spin coating speed and **b)** different concentration.

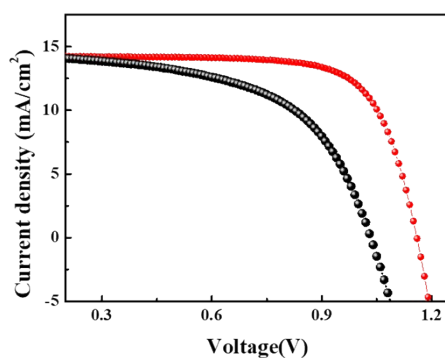

**Figure S5.**  $J$ - $V$  curve of the device obtained at a concentration of 5mg/ml PFDTBT (the scan directions of red line and black line are reverse scan (RS) and forward scan (FS), respectively.)

**Table S2** Device performance parameters with PTDTBT processed by different concentrations of HTM.

| Concentration(mg/ml) | $J_{sc}$ (mA/cm <sup>2</sup> ) | $V_{oc}$ (V) | $FF$ (%) | $PCE$ (%) |
|----------------------|--------------------------------|--------------|----------|-----------|
| 2.5                  | 14.3                           | 1.10         | 70.21    | 11.04     |
| 5                    | 14.2                           | 1.19         | 75.91    | 12.83     |
| 7.5                  | 13.9                           | 1.18         | 75.82    | 12.43     |
| 10                   | 9.11                           | 1.20         | 53.10    | 5.82      |

**Table S3.** Device performance parameters with PTDTBT processed by different spin coating speed.

| Spin coating(rpm) | $J_{sc}$ (mA/cm <sup>2</sup> ) | $V_{oc}$ (V) | $FF$ (%) | $PCE$ (%) |
|-------------------|--------------------------------|--------------|----------|-----------|
| 2000              | 14.0                           | 1.15         | 74.67    | 12.05     |
| 3000              | 14.2                           | 1.17         | 76.01    | 12.63     |
| 4000              | 14.3                           | 1.16         | 75.26    | 12.41     |
| 5000              | 14.3                           | 1.12         | 72.11    | 11.55     |

**Table S4.** Fitting parameters of TRPL decay spectra based on CsPbI<sub>2</sub>Br -film and CsPbI<sub>2</sub>Br /PTDTBT-film.

| Films                              | $\tau_1$ (ns) | $\tau_2$ (ns) | $\tau_{ave}$ (ns) |
|------------------------------------|---------------|---------------|-------------------|
| CsPbI <sub>2</sub> Br -film        | 4.5550        | 9.2752        | 2.04              |
| CsPbI <sub>2</sub> Br /PTDTBT-film | 18.3664       | 31.3710       | 32.83             |

**Table S5.** Device performance parameters.

| Device   | $J_{sc}$ (mA/cm <sup>2</sup> ) | $V_{oc}$ (V) | $FF$ (%) | $PCE$ (%)  |
|----------|--------------------------------|--------------|----------|------------|
| Control  | 14.2±0.21                      | 1.09± 0.31   | 67.1±3.9 | 10.81±0.87 |
| PFDTBTDT | 14.2±0.15                      | 1.18±0.14    | 78.2±1.6 | 12.83±0.41 |

**Table S6.** The specific performance parameters corresponding to the  $J$ - $V$  curve measured in the reverse and forward scanning directions.

| Spin coating(rpm) | $J_{sc}$ (mA/cm <sup>2</sup> ) | $V_{oc}$ (V) | $FF$ (%) | $PCE$ (%) |
|-------------------|--------------------------------|--------------|----------|-----------|
| Reverse scanning  | 14.0                           | 1.07         | 62.12    | 9.31      |
| Forward scanning  | 14.0                           | 1.19         | 76.01    | 12.67     |
